# Supplementary material for: Analysis of Myocardial Ischemia Parameters after Coronary Artery Bypass Grafting with Minimal Extracorporeal Circulation and a Novel Microplegia versus Off-Pump Coronary Artery Bypass Grafting
Source: Mediators Inflamm. 2020 Jan 25;2020:5141503. doi: 10.1155/2020/5141503 (PMC7056992; doi:10.1155/2020/5141503)
Supplement: Supplementary Materials — Figure 1S: distribution of the propensity score in the two treatment groups. The red lines indicate the cut-off points beyond which observations were dropped before analysis. Figure 2S: standardized differences. [file 5141503.f1.pdf]

1      **Analysis of Myocardial Ischemia Parameters After Coronary Artery**  
2      **Bypass Grafting with Minimal Extracorporeal Circulation and a Novel**  
3      **Microplegia Versus Off-Pump Coronary Artery Bypass Grafting**

---

4                      **Online Supplemental**

5

1 **Figure 1S.** Distribution of the propensity score in the two treatment groups.

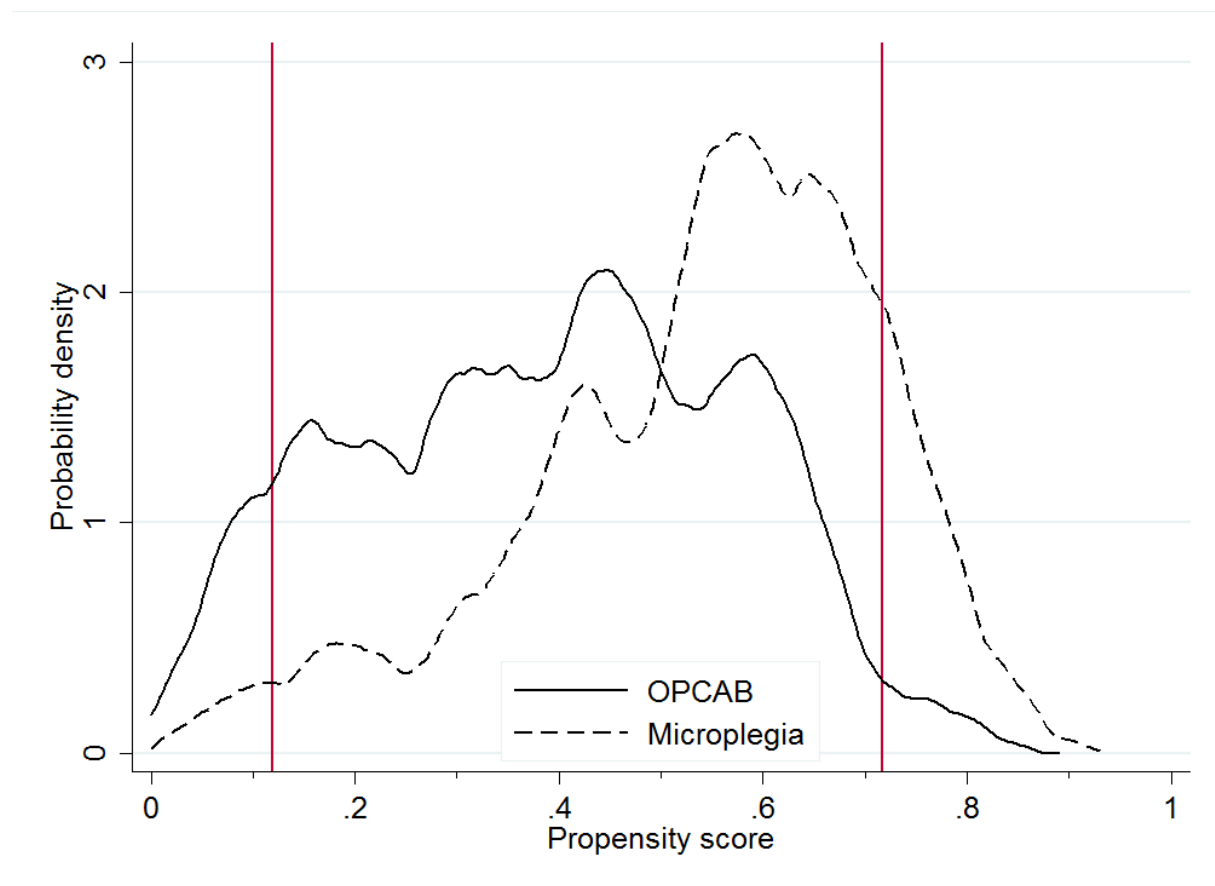

2

3 The red lines indicate the cut-off points beyond which observations were dropped before  
4 analysis.

5

**Figure 2S.** Standardized differences

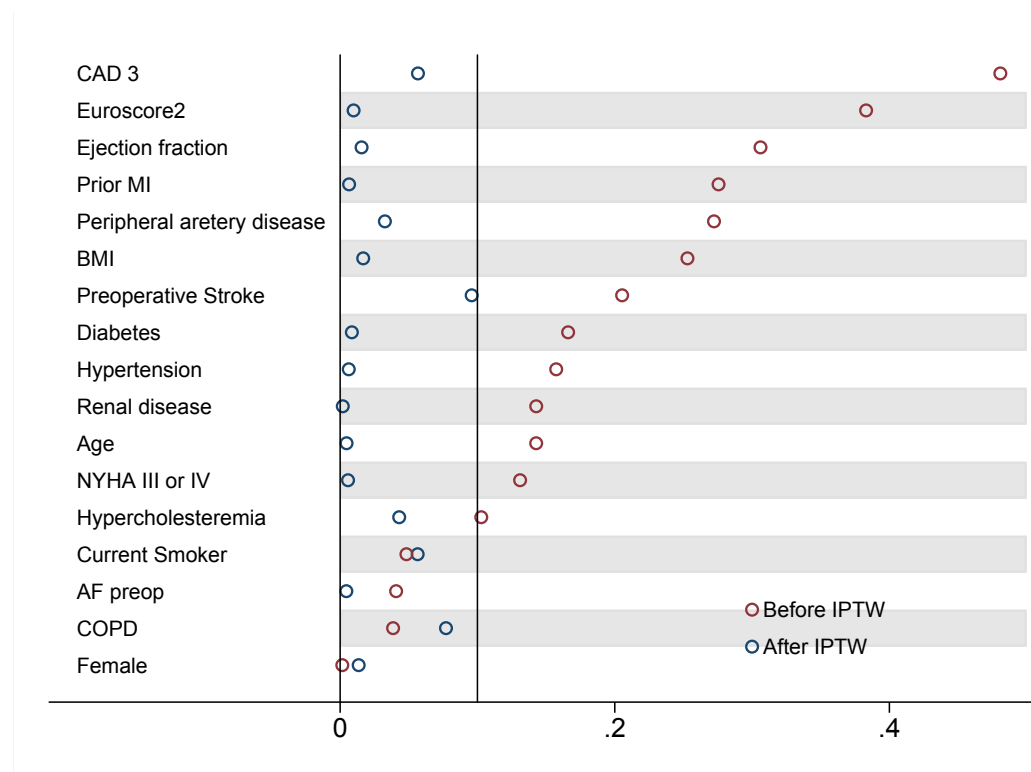

CAD: Coronary artery disease

MI: Myocardial infarction

BMI: Body mass index

AF: Atrial fibrillation

COPD: Chronic obstructive pulmonary disease
